# Supplementary material for: The long non-coding RNA SNHG12 promotes gastric cancer by activating the phosphatidylinositol 3-kinase/AKT pathway
Source: publisher site journal article supplement (doi:10.18632/aging.102493), 2019-12-05
Supplement: Supplementary file [file aging-v11i23-102493-supplementary-material-SD2.pdf]

**SUPPLEMENTARY FIGURES**

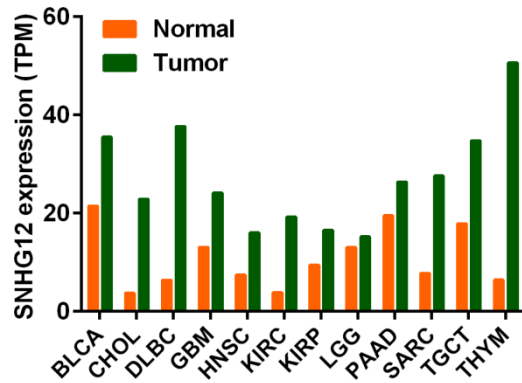

**Supplementary Figure 1. SNHG12 was upregulated in various malignancies.** The data is the RNA sequencing data downloaded from the GEPIA (Gene Expression Profiling Interactive Analysis, <http://gepia.cancer-pku.cn/index.html>), and the unit for the expression level of SNHG12 is TPM (Transcripts Per Kilobase of exon model per Million mapped reads).

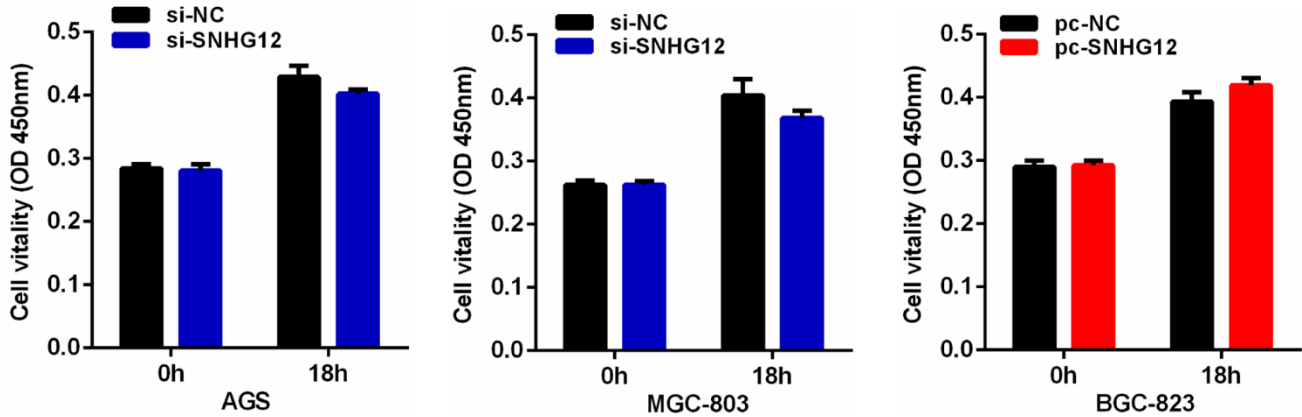

**Supplementary Figure 2. Proliferative activities at 18h of AGS and MGC-803 cells transfected with si-SNHG12 and BGC-823 cells transfected with pc-SNHG12 were detected by CCK-8 assay.**

PI3K-AKT SIGNALING PATHWAY

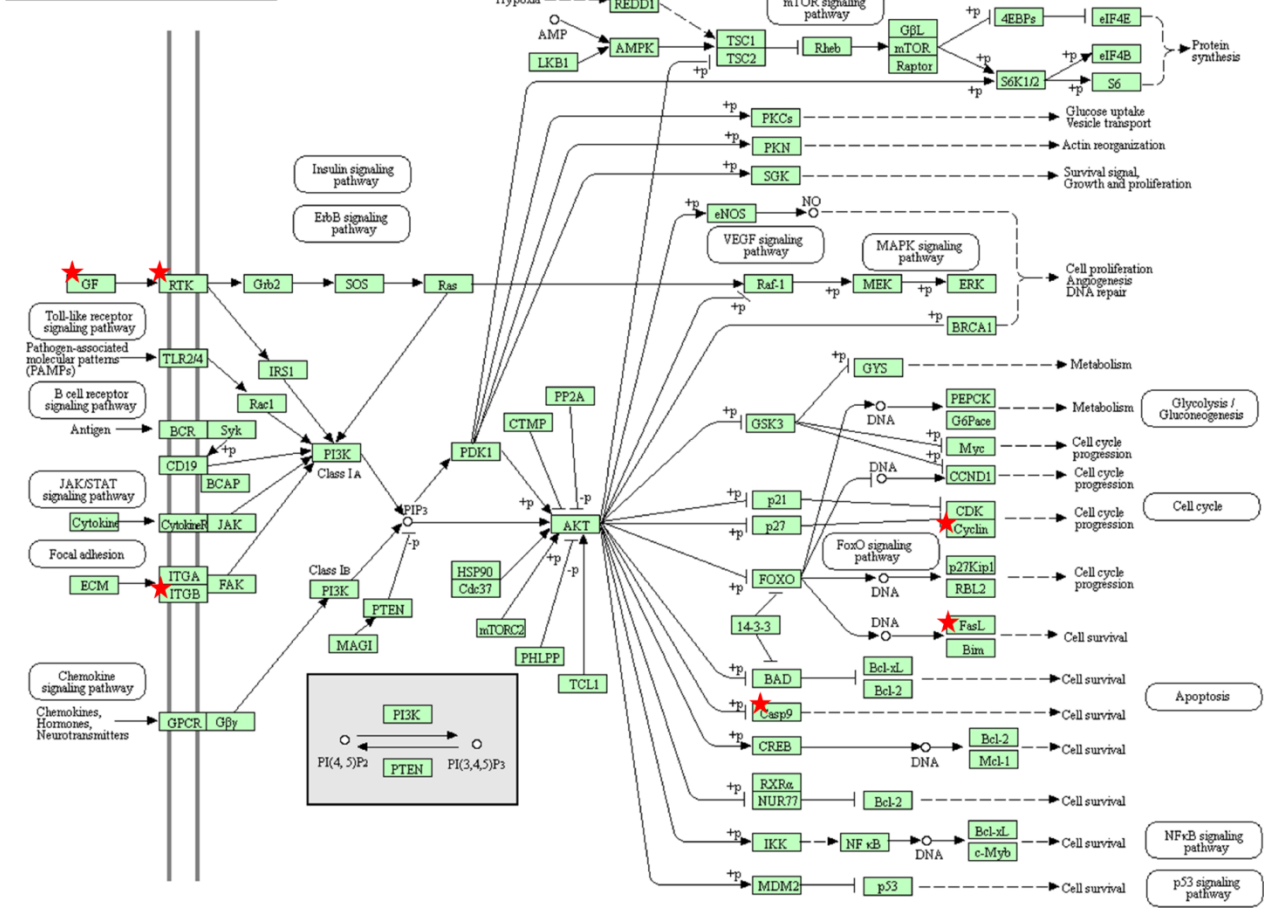

Supplementary Figure 3. The differentially expressed genes enriched in the PI3K/AKT pathway analyzed by DAVID website.
